# Supplementary material for: High spin polarization, large perpendicular magnetic anisotropy and room-temperature ferromagnetism by biaxial strain and carrier doping in Janus MnSeTe and MnSTe
Source: Royal Society of Chemistry journal article supplement (doi:10.1039/d3nr04627c), 2023-01-01
Supplement: d3nr04627c1.pdf [file d3nr04627c1.pdf]

## Supplementary Information

### High spin polarization, large perpendicular magnetic anisotropy and room-temperature ferromagnetism by biaxial strain and carrier doping in Janus MnSeTe and MnSTe

Long Zhang,<sup>a</sup> Yan Zhao,<sup>a</sup> Yuqi Liu,<sup>a</sup> and Guoying Gao<sup>\*a,b</sup>

<sup>a</sup>School of Physics, Huazhong University of Science and Technology, Wuhan 430074, China

<sup>b</sup>Wuhan National High Magnetic Field Center, Huazhong University of Science and Technology,

Wuhan 430074, China

\*E-mail: guoying\_gao@mail.hust.edu.cn

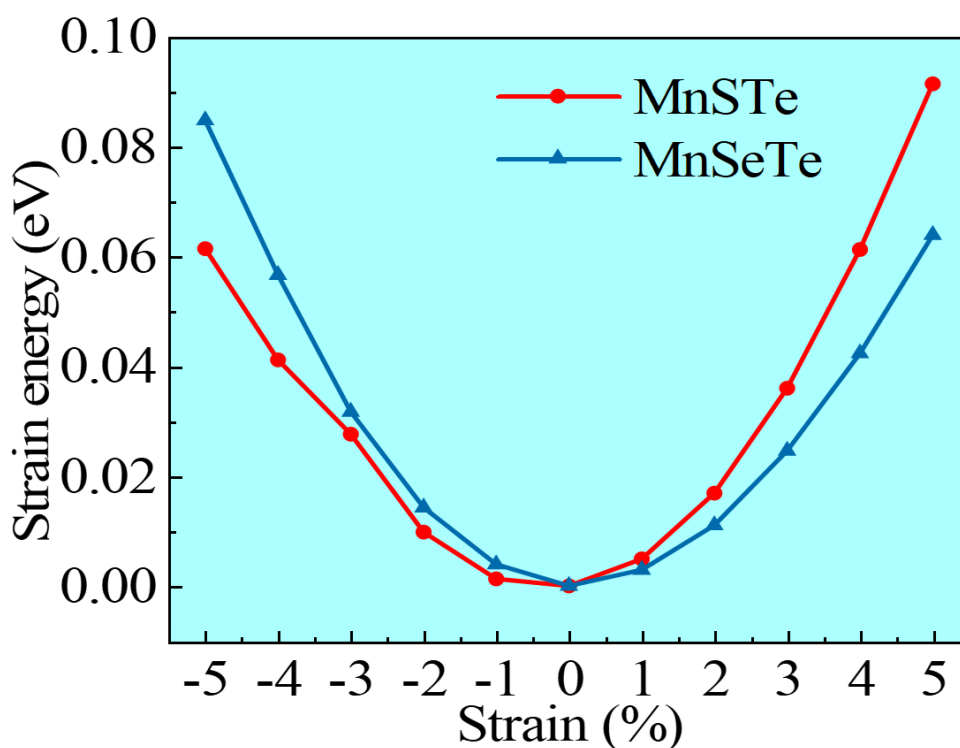

Fig. S1. The strain energies of monolayer MnSTe and MnSeTe under biaxial strain.

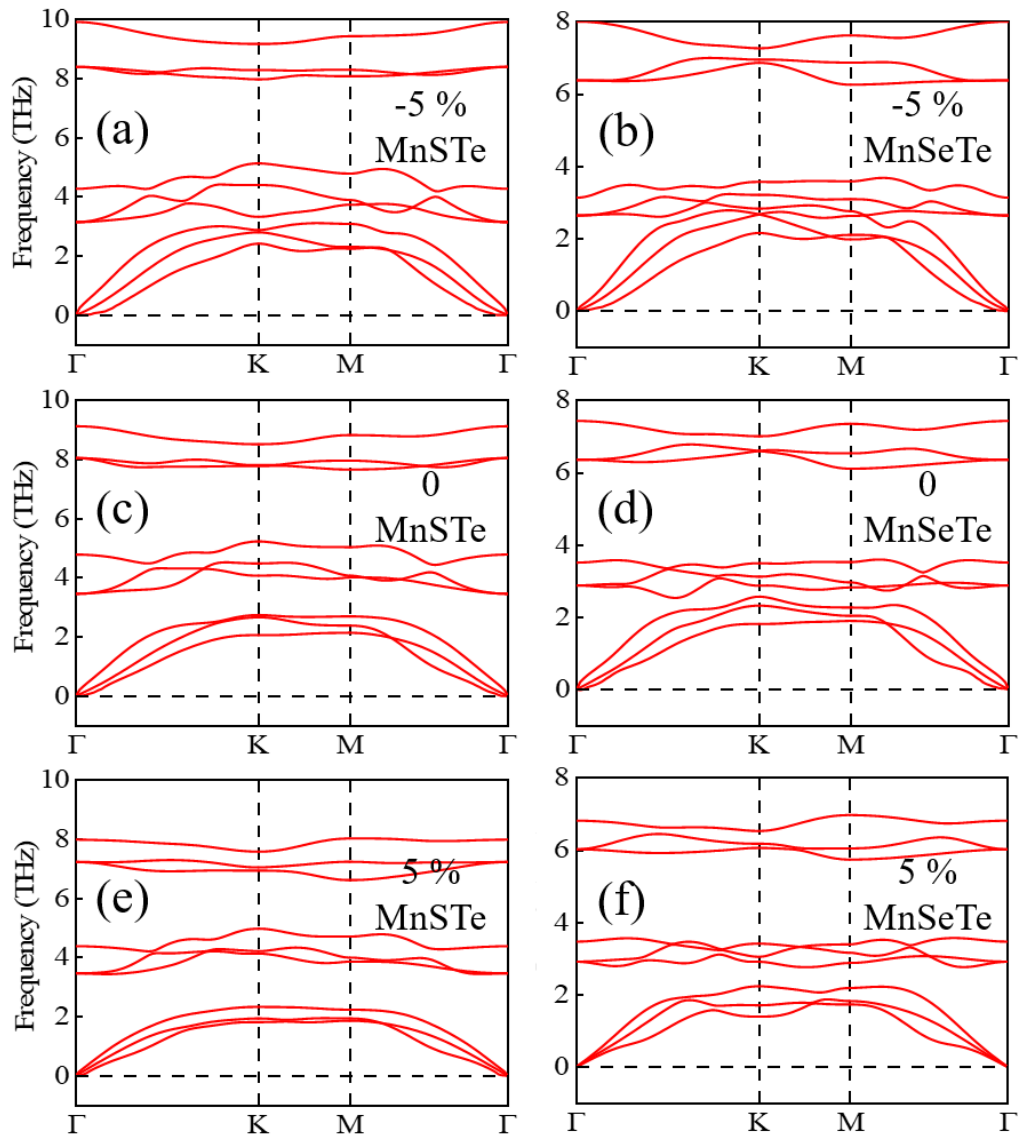

Fig. S2. Phonon dispersion of monolayer MnSTe and MnSeTe under -5 %, 0 and 5 % strain.

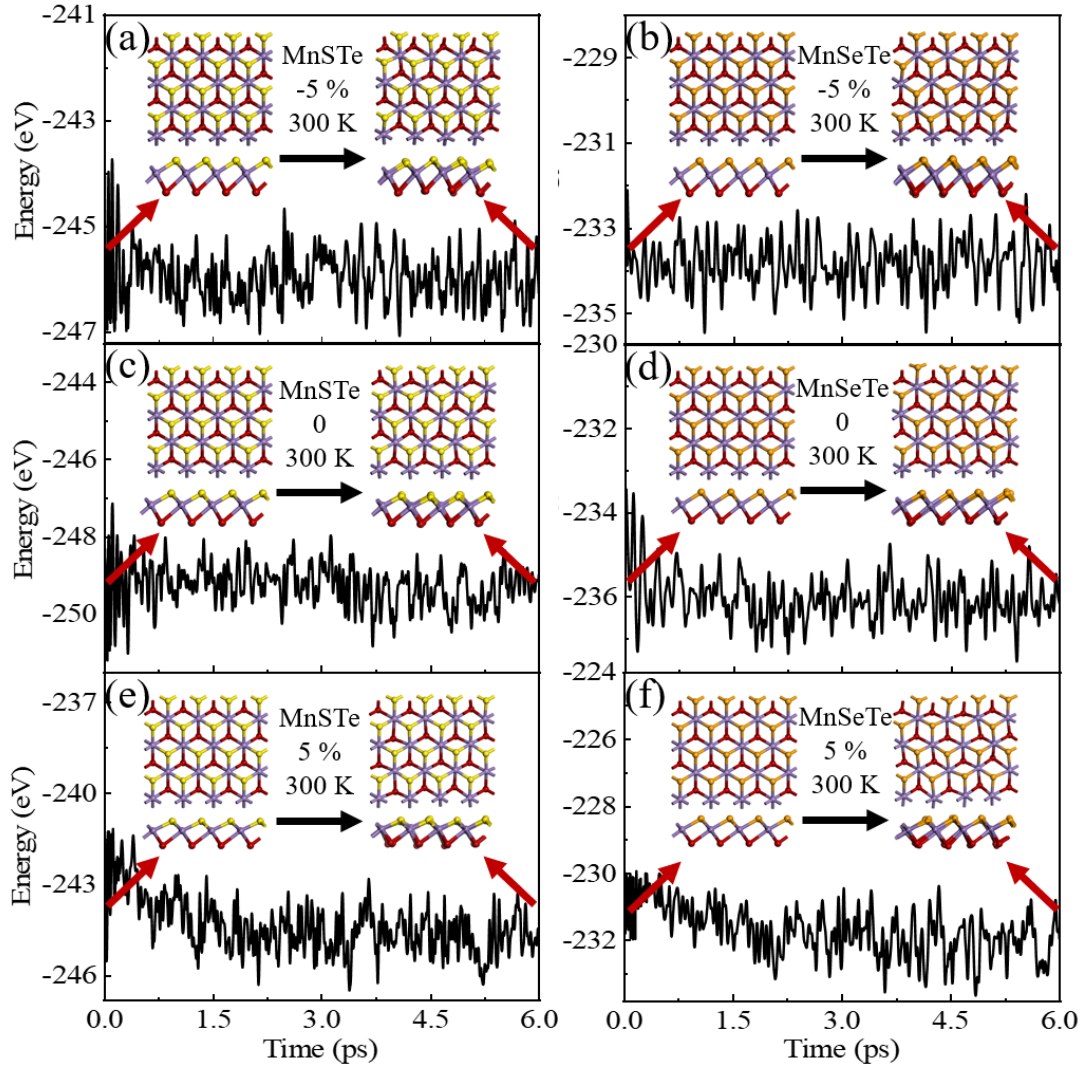

Fig. S3. The fluctuation of total energies and snapshots of geometric structures of monolayer MnSTe and MnSeTe under -5 %, 0 and 5 % strain.

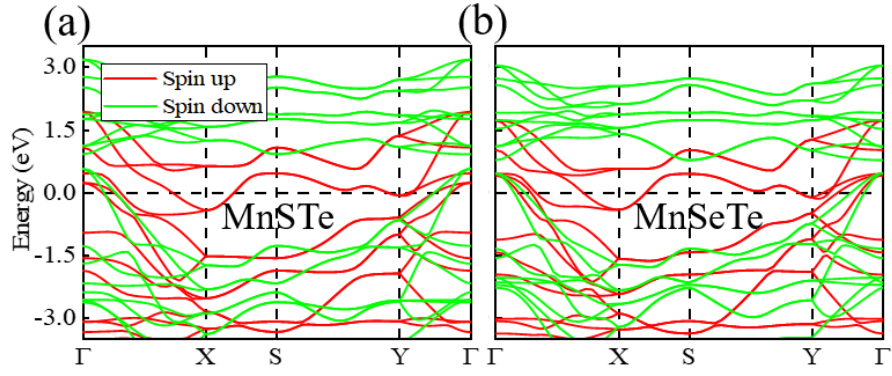

Fig. S4. The spin-dependent electronic band structures of monolayer MnSTe (a) and MnSeTe (b).

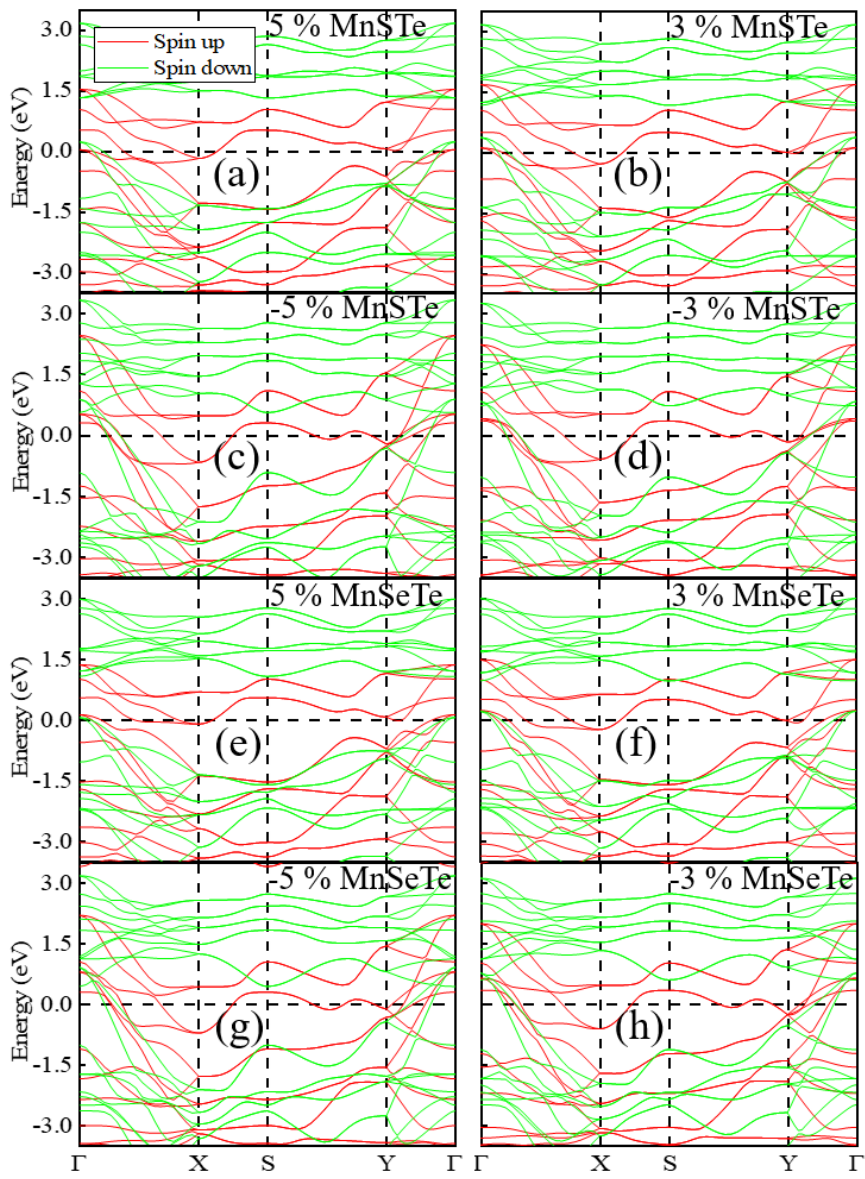

Fig. S5. The spin-dependent electronic band structures of monolayer MnSTe (a, b, c, d) and MnSeTe (e, f, g, h) with ferromagnetic state under various strains.

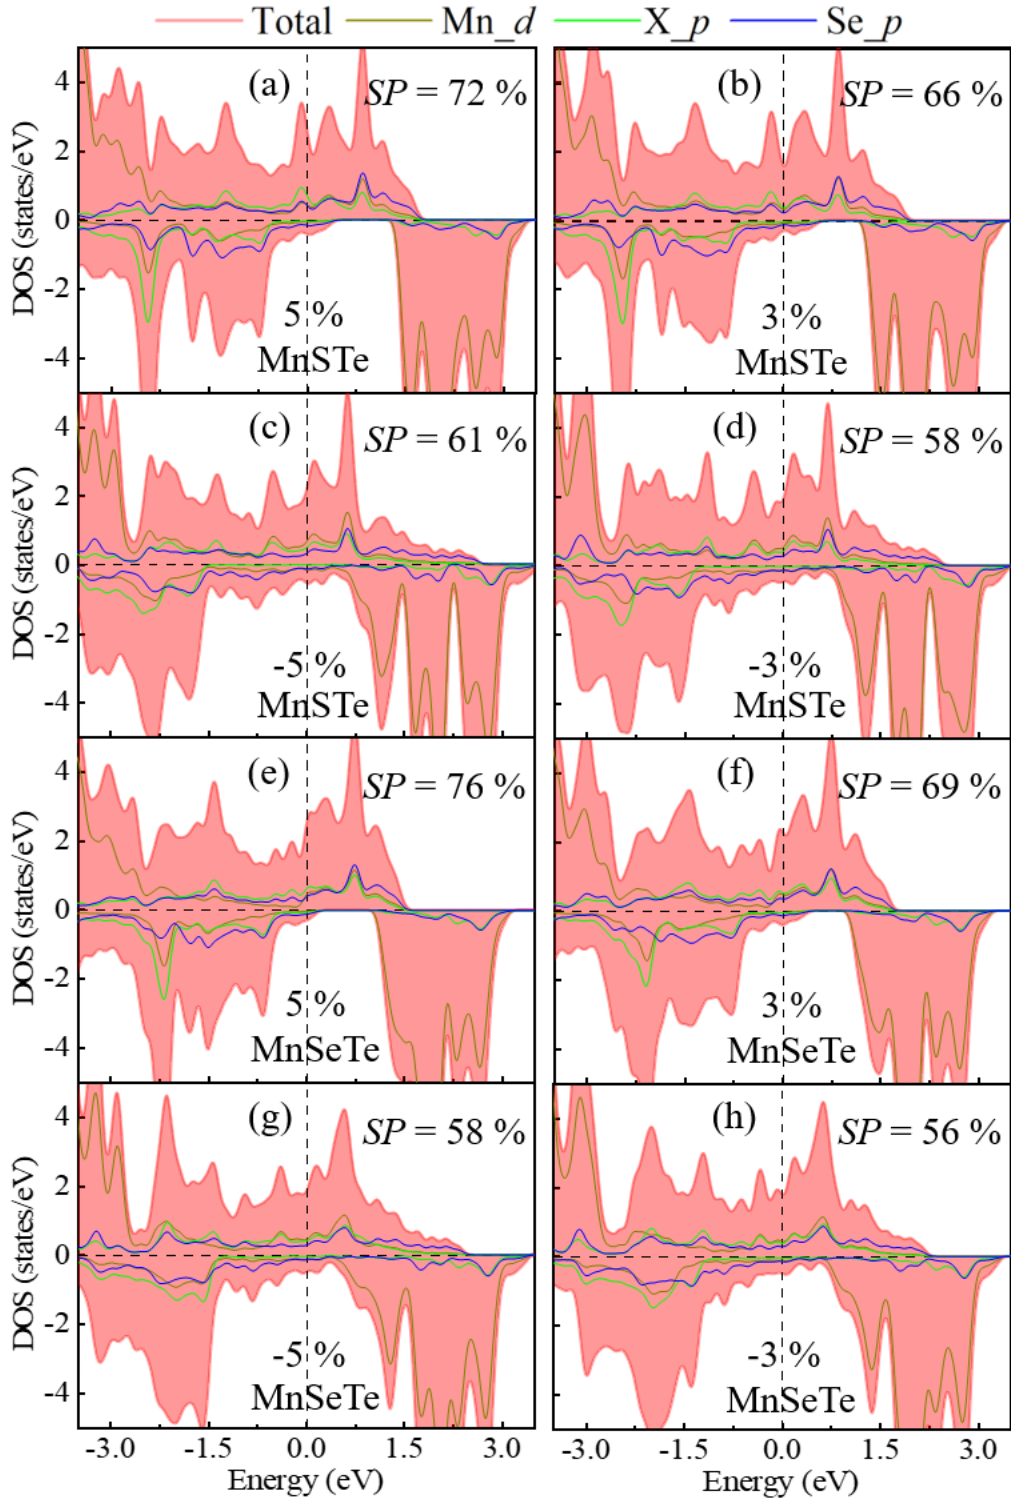

Fig. S6. The spin-dependent total and main projected DOSs of monolayer MnSTe (a, b, c, d) and MnSeTe (e, f, g, h) with ferromagnetic state under various strains.

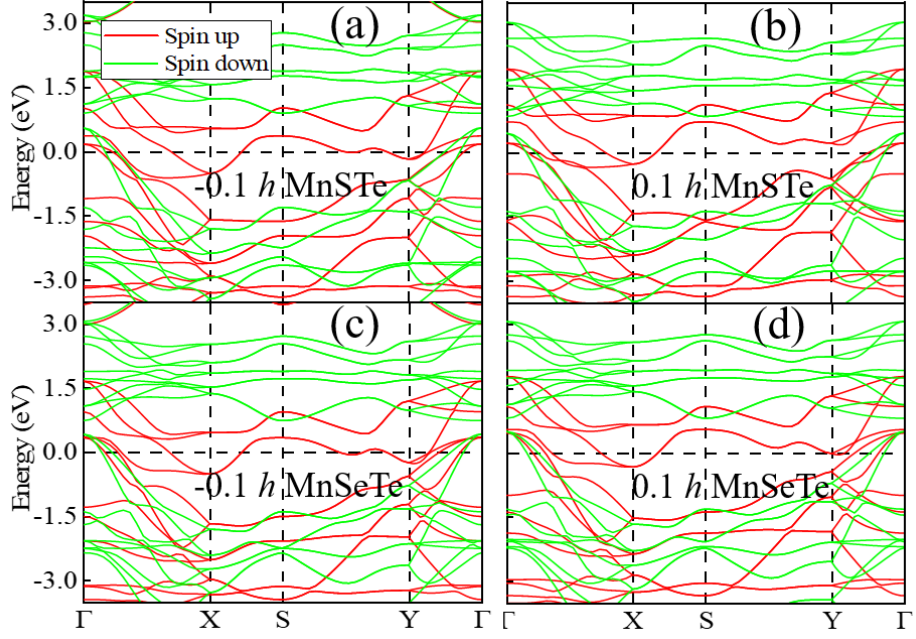

Fig. S7. The spin-dependent electronic band structures of monolayer MnSTe (a, b) and MnSeTe (c, d) with carrier doping.

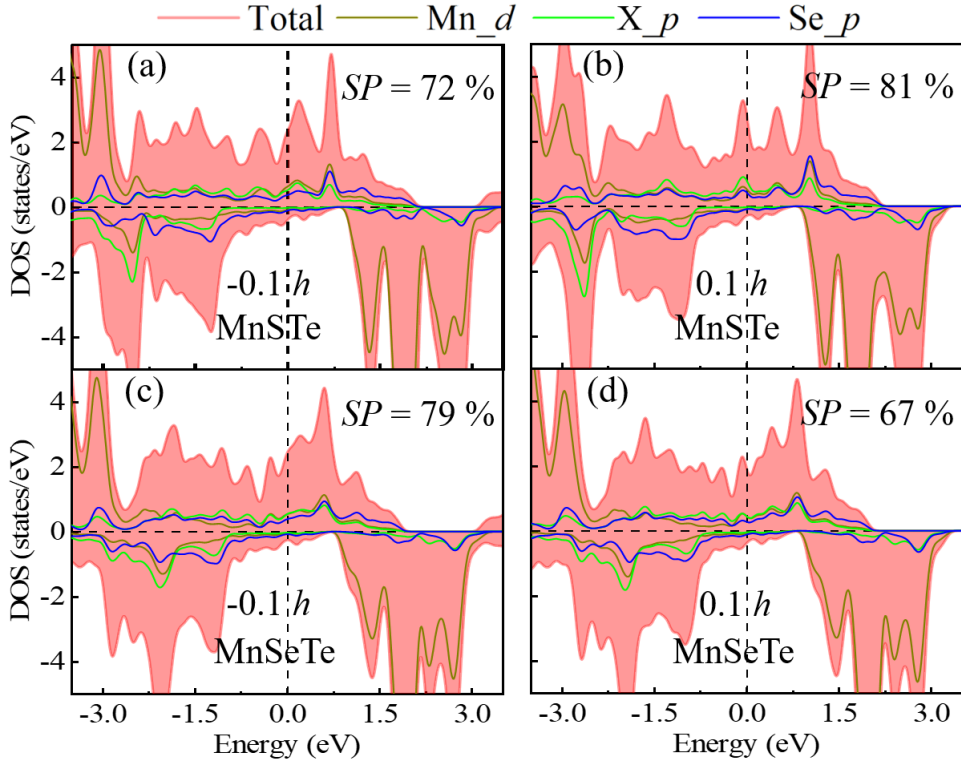

Fig. S8. The spin-dependent total and main projected DOSs of monolayer MnSTe (a) and MnSeTe (b) with carrier doping.

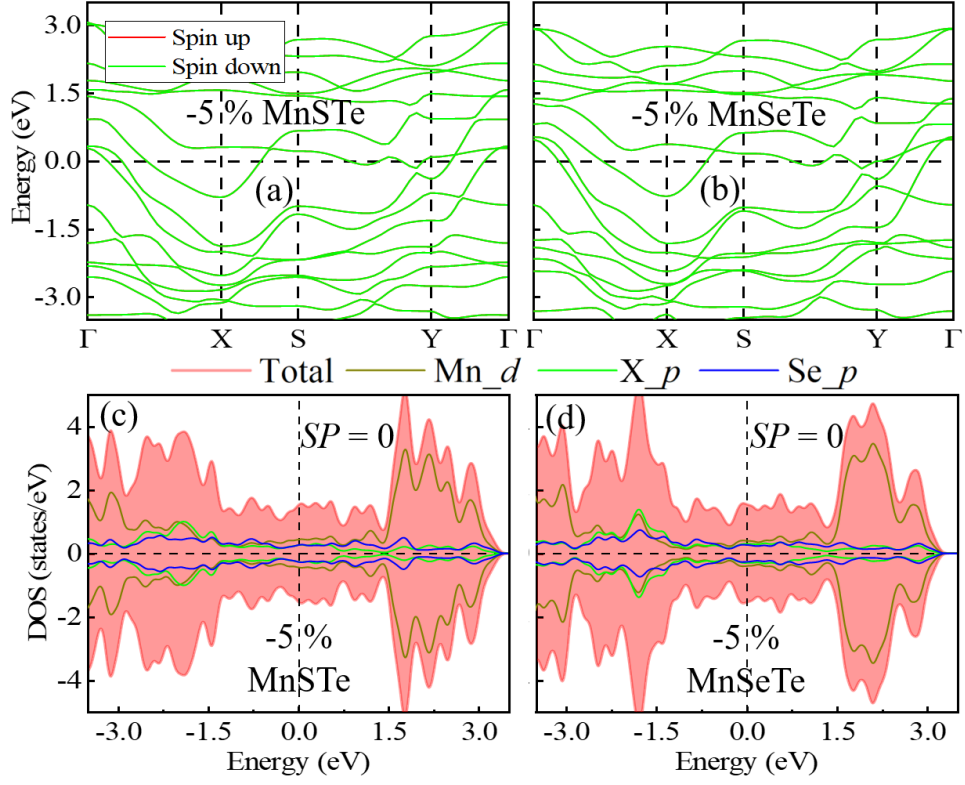

Fig. S9. The spin-dependent electronic band structures (a, b), total and main projected DOSs (c, d) of monolayer MnSTe and MnSeTe with antiferromagnetic state under the -5 % strain.

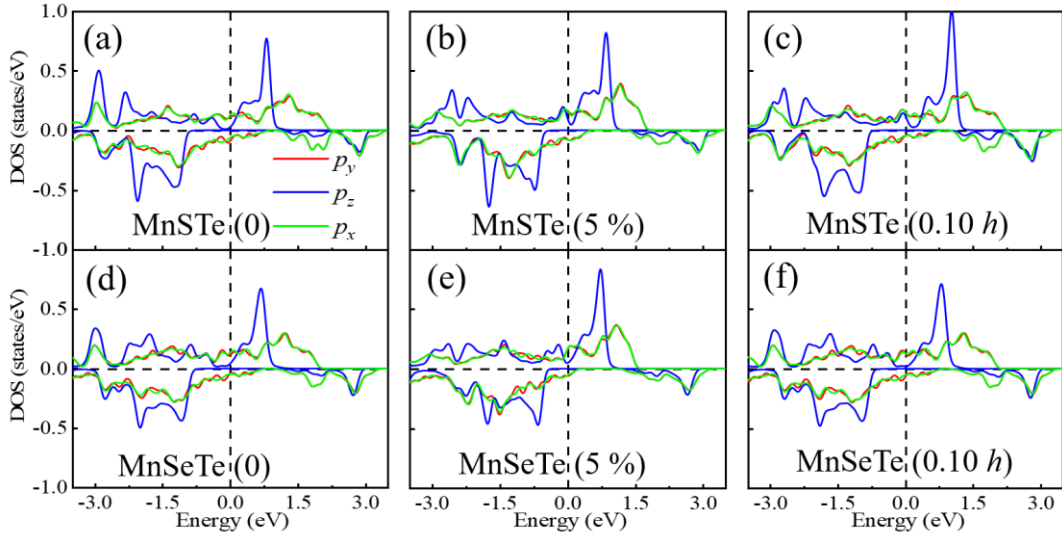

Fig. S10. Projected DOSs of Te- $p$  orbitals of monolayer MnSTe (a,b,c) and MnSeTe (d,e,f) with 0, 5 % strain and 0.10  $h$  doping.

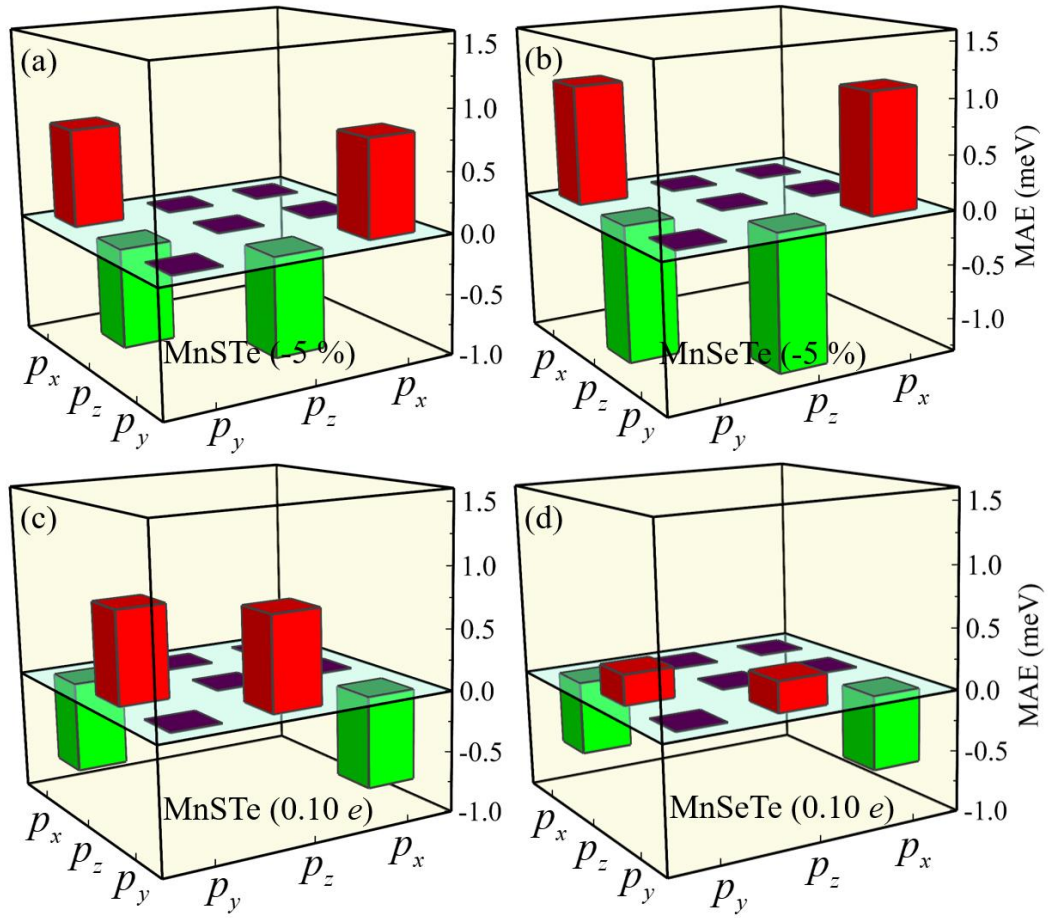

Fig. S11. MAE contributions from Te- $p$  orbitals hybridization of monolayer MnSTe and MnSeTe with -5 % strain (a, b) and 0.10  $e$  doping (c, d).



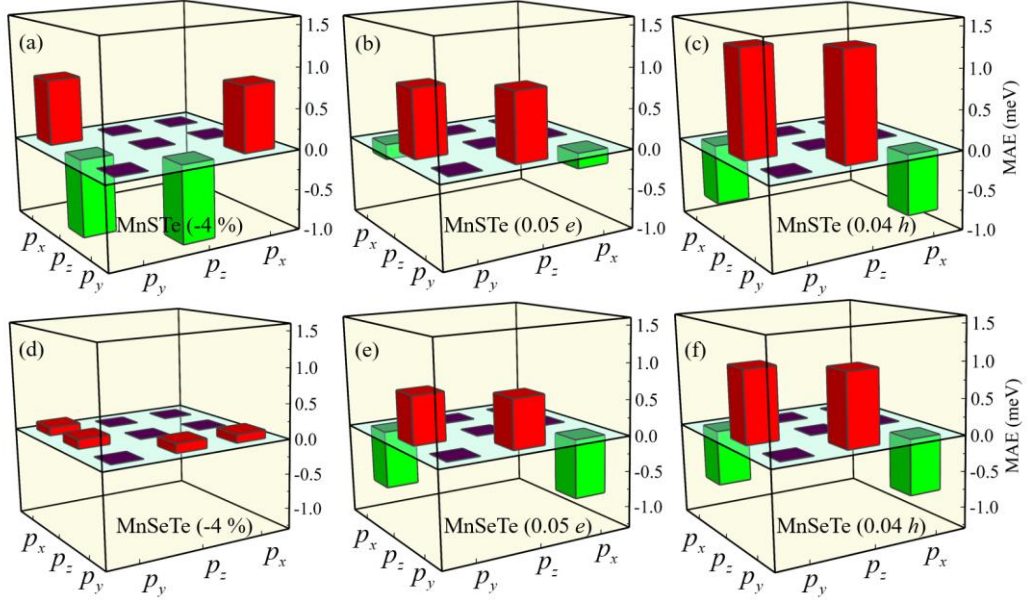

Fig. S12. MAE contributions from Te- $p$  orbitals hybridization of monolayer MnSTe with -4 % strain (a), 0.05  $e$  and 0.04  $h$  doping (b, c), and monolayer MnSeTe with -4 % strain (d), 0.05  $e$  and 0.04  $h$  doping (e, f).

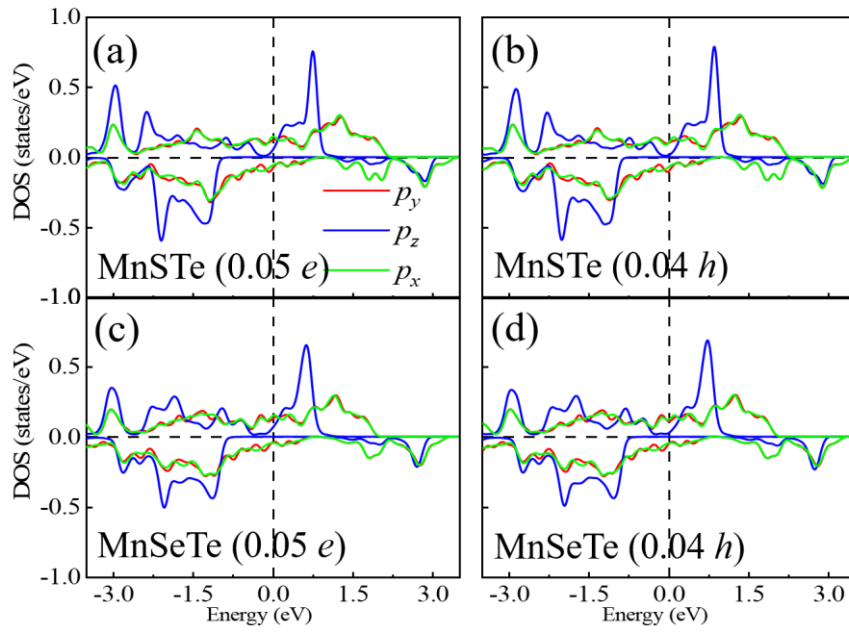

Fig. S13. Projected DOSs of Te- $p$  orbitals of monolayer MnSTe (a,b) and MnSeTe (c,d) with 0.05  $e$  and 0.04  $h$  doping.

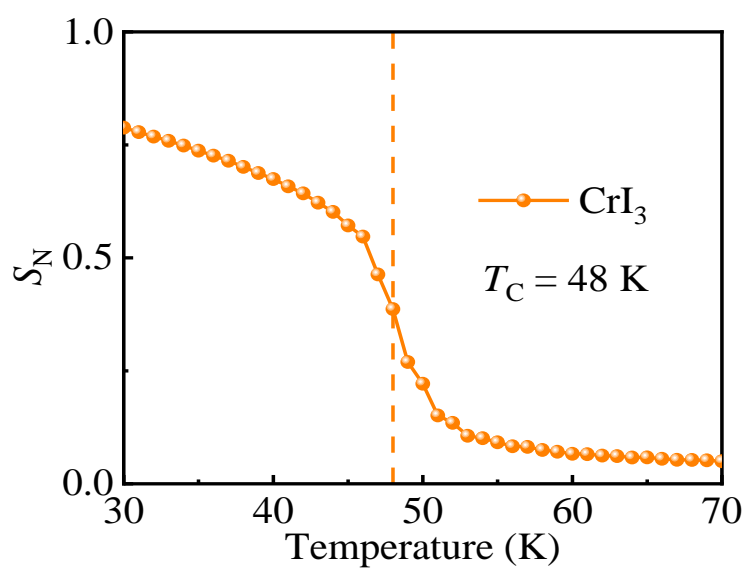

Fig. S14. The normalized spin operator ( $S_N$ ) varying with the increasing of temperature for monolayer CrI<sub>3</sub>.
